# Supplementary material
Source: publisher site journal article supplement (https://www.spandidos-publications.com/3709/downloadSupplementary)
Supplement: Supplementary file 2 [file downloadSupplementary]

## Sheet: Sheet1
Table SI. Clinicopathological data of patients with HCC and healthy controls.
Sample No	Technique used	Sex	Age	Infection	Antiviral drug	Cirrhosis	Ascites	Drinking	Child-pugh	Treat or Not	Treatment	Metastasis	Tumor size (mm)	BCLC classification	ALT（U/l）	AST(U/l)	GGT(U/l)	TB(µmol/l)	ALB(g/l)	PT(s)	AFP(ng/ml)	WBC(10^9/l)	Neutrophil(10^9/l)	Lymphocyte(10^9/l)	Platelet (10^9/l)
H1	RNA-Seq & qRT-PCR	Male	37	HBV	Yes	No	No	No	A	Yes	Interventional therapy	\	60x90	C	35	144.8	548.8	27.5	35.3	12.7	80000	7.85	5.97	1.24	413
H2	RNA-Seq & qRT-PCR	Female	67	HBV	Yes	Yes	No	No	A	No	\	\	45x54x48	A	30.6	28	129.5	16.1	38.1	13	302.8	11.87	5.82	1.5	215
H3	RNA-Seq & qRT-PCR	Male	26	HBV	NO	Yes	No	No	A	Yes	Excision	\	\	\	55.6	26	24.1	15.7	43.9	13.2	3.6	6.24	3.54	2.15	204
H4	RNA-Seq & qRT-PCR	Female	30	HBV	Yes	Yes	Yes	No	A	Yes	Excision	Lymph node metastasis	47x49x49	C	70.2	69.5	174.2	15.5	35.2	14	191120	4.01	2.21	1.37	243
H5	RNA-Seq & qRT-PCR	Male	36	HBV	Yes	Yes	No	No	A	No	\	Lymph node metastasis	110x80x70	C	55.2	54.6	104.2	14.9	30.8	14.6	1.5	10.08	7.88	1.17	329
H6	RNA-Seq & qRT-PCR	Female	14	HBV	No	No	No	No	A	Yes	Interventional therapy	Bone metastatis	130x95x75	D	43.6	75.7	225.5	9.4	34.6	13.1	202000	5.44	4.32	0.77	284
H7	RNA-Seq & qRT-PCR	Male	72	HBV	No	No	Yes	No	B	Yes	Interventional therapy	Lymph node metastasis	43x50	C	98.3	350.9	1143.6	64.3	40	12.7	2000	12.47	10.12	1.77	289
H8	RNA-Seq & qRT-PCR	Male	46	HBV	No	No	No	No	A	Yes	Excision	\	19x17	A0	73.8	28.2	71.6	21	50	12.5	12.1	11.38	7.58	2.98	143
H9	RNA-Seq & qRT-PCR	Male	69	HBV	Yes	Yes	Yes	No	A	Yes	Interventional therapy	Multiple metastases	\	D	47	50.7	269.2	25.3	39.6	12.5	6.6	6.89	4.1	1.53	98
H10	RNA-Seq & qRT-PCR	Male	63	HBV	No	Yes	No	No	A	Yes	Interventional therapy	Liver metastasis	45x31	C	19.6	17.6	41.1	13.9	39.5	12.7	26.3	8.96	7.16	1.36	164
H11	RNA-Seq & qRT-PCR	Female	74	HBV	Yes	Yes	No	No	A	No	\	Multiple metastases	32x27; 34x29	B	42.6	45.2	62.3	17.1	43.8	12.7	193.6	6.16	4.11	1.57	198
H12	RNA-Seq & qRT-PCR	Male	78	HBV	Yes	Yes	No	No	A	Yes	Interventional therapy	Liver metastasis	12x8; 35x30	A	15.4	16.1	28.4	12.9	41.9	12.6	2.4	4.61	3.12	0.94	128
H13	RNA-Seq & qRT-PCR	Male	76	HBV	No	Yes	Yes	No	B	Yes	Excision	Multiple metastases	21x22	D	17.9	44.2	133.5	36.7	37.1	14.8	13.8	4.68	2.93	1.41	154
H14	RNA-Seq & qRT-PCR	Female	63	HBV	Yes	Yes	No	No	A	No	\	\	10x12	A	24.9	41.5	104.8	31.3	34.6	17.1	3	5.12	3.36	1.23	59
H15	RNA-Seq & qRT-PCR	Male	14	HBV	Yes	Yes	Yes	No	A	Yes	Excision	Multiple metastases	96x57x83	D	40.2	36.9	170.7	17	37.4	14.2	36100.9	2.56	1.47	0.82	105
H16	RNA-Seq & qRT-PCR	Male	57	HBV	Yes	Yes	No	No	A	No	\	\	10x8	A0	72.5	45	31.9	13.6	37.1	13.2	14.3	9.71	8.73	0.56	120
H17	RNA-Seq & qRT-PCR	Female	39	HBV	No	Yes	Yes	No	A	No	\	\	123x103	B	29.1	306	400.1	31.3	40.3	13.1	\	8.68	7.15	0.74	889
H18	RNA-Seq & qRT-PCR	Male	58	HBV	No	No	No	Yes	B	No	\	Liver metastasis	160x130	D	71	70.3	520.6	18.1	28.6	12.7	11.3	6.76	4.77	2	251
H19	RNA-Seq & qRT-PCR	Male	46	HBV	No	No	Yes	No	C	No	\	Multiple metastases	150x130	D	46.6	124.8	360.8	269.4	25.8	15	622.2	17.62	16.11	0.57	303
A1	qRT-PCR	Male	55	HBV	Yes	Yes	No	No	A	Yes	Interventional therapy	\	10x13x13	\	19.3	24.5	23.5	22.7	45.7	13.3	1.3	3.19	2.15	0.82	125
A2	qRT-PCR	Male	74	HBV	Yes	Yes	Yes	No	A	No	\	\	22	A	33.6	39.8	37.3	10	43	12.7	1996.2	4.12	2.2	1.54	133
A3	qRT-PCR	Male	63	HBV	Yes	Yes	Yes	No	A	Yes	Excision	No metastasis	85x25	B	17.4	24.9	30	29.6	47.4	12.1	5.2	4.11	2.41	1.16	79
A4	qRT-PCR	Male	53	HBV	Yes	Yes	No	No	A	No	\	\	45x41	A	27.1	25	65.6	10.4	47.3	13.6	3	4.4	3.01	1.2	198
A5	qRT-PCR	Female	82	HCV	No	Yes	No	No	A	Yes	Interventional therapy	No metastasis	33x30	A	88.5	124	430.1	34.6	32.9	16.8	\	6.32	4.48	1.25	409
A6	qRT-PCR	Male	58	HBV	Yes	No	No	No	A	Yes	Interventional therapy	\	\	A	31.6	48.7	69	16.6	46.7	\	330.6	6.79	4.66	1.59	131
A7	qRT-PCR	Male	63	HBV	No	No	No	No	A	No	\	No metastasis	\	C	20.4	22.3	35.2	32.3	31.2	16.3	115.7	3.69	2.24	1.14	59
A8	qRT-PCR	Female	58	HCV	Yes	Yes	No	No	A	Yes	Interventional therapy	No metastasis	15x14	A	18.2	43.8	75	41.8	35.4	16.3	1041	9.19	7.19	0.87	64
A9	qRT-PCR	Male	70	HBV	No	Yes	No	Yes	A	No	\	Multiple metastases	\	C	31.6	48.7	69	16.6	46.7	\	330.6	6.79	4.66	1.59	131
